# Supplementary material
Source: PubMed Central journal article supplement (PMC3380600)
Supplement: supp_mcs104_mcs104supp.pdf [file supp_mcs104_mcs104supp.pdf]

## SUPPLEMENTARY DATA

TABLE S1. Primers used for gene cloning in this study

| Gene classification          | Primer name | Sequences                        | Gene name (sequenced clone no.)                                                        |
|------------------------------|-------------|----------------------------------|----------------------------------------------------------------------------------------|
| B-class<br>MADS-box<br>genes | B1          | 5'- AACAGGCAGGTSACCTAYTC - 3'    | <i>SIchAP3-1</i> (14), <i>SIchAP3-2</i> (5), <i>SIchAP3-3</i> (15), <i>SIchPI</i> (28) |
|                              | B2          | 5'- TYACTGTTCTMTGTGATGCT - 3'    | <i>DEinAP3-1</i> (18), <i>DEinAP3-2</i> (6), <i>DEinPI</i> (38)                        |
|                              |             |                                  | <i>HOgrAP3</i> (44), <i>HOgrPI</i> (25)                                                |
| C-class<br>MADS-box<br>genes | L2          | 5'- CARGTSACCTTYTGCAARCG - 3'    | <i>SIchAG</i> (2)                                                                      |
|                              | L5          | 5'- TCYGTKCTYTGTGATGCWG - 3'     | <i>DEinAG</i> (2)                                                                      |
|                              |             |                                  | <i>HOgrAG1</i> (3), <i>HOgrAG2</i> (3)                                                 |
| E-class<br>MADS-box<br>genes | SEP1        | 5' - GAGAACAARATHAACAGGCARG - 3' |                                                                                        |
|                              | SEP2        | 5' - AGGTTGCTCTMATMATYTTC - 3'   | <i>SIchSEP3</i> (22)                                                                   |

TABLE S2. Primers used for *in situ* hybridization and RT-PCR in this study

|                              | Gene             | Forward primer (5'-3') | Reverse primer (5'-3') |
|------------------------------|------------------|------------------------|------------------------|
| <i>In situ</i> hybridization | <i>SIchFL1</i>   | TCTGATCTCCAAAGAAAGG    | GACATGGTAGAAGAGTCTCC   |
|                              | <i>SIchFL2</i>   | GAGCAGAATAACCAGCTAGG   | CCTTCCCATGTCTATTACGC   |
|                              | <i>SIchAP3-1</i> | TGCGTGGTCTTGAGCAAGAA   | CGATGATGGAATGTTAGAGGG  |
|                              | <i>SIchAP3-2</i> | GGATGAGCCTCAATTCGCAC   | CTACTGACCAGGGAAAGTCTG  |
|                              | <i>SIchAP3-3</i> | TGAGCAAGAAATGGAGAGT    | TGAAGATTGGGTTGAGC      |
|                              | <i>SIchPI</i>    | GAAATGGATGGGAATGTGCGA  | TATGGCAACCTACGTACAAGC  |
|                              | <i>SIchAG</i>    | ACTCAAACAGGCACTTCA     | ACATCGTATTCATTTCCCG    |
|                              | <i>SIchSEP3</i>  | GTGAACTATGGTCGACAGCA   | CTCGCACACAAACAAGGATCG  |
| RT-PCR                       | <i>SIchAP3-1</i> | CGGTATCAGCAAACCTCTAGG  | TTCTTCCTTCCTGAACCAG    |
|                              | <i>SIchAP3-2</i> | GGCAGAGGATTGGTGGAGATG  | GTGCCAAATCCACTTCCATTC  |
|                              | <i>SIchAP3-3</i> | TCAACAACAACGAAGAGGT    | TAGTACCTTCCGTTATCTGC   |
|                              | <i>SIchPI</i>    | AGAGGTTGTGGGATGCTAAGC  | GGTAAACGGCATCTGATGAG   |
|                              | <i>SIchAG</i>    | CTCGAAATTGCGCCAACCTG   | GTTCCGAGAGTCAAATGGTGC  |

TABLE S3. Representative floral MADS-box genes used in the phylogenetic analysis

| Gene classification          | Order                           | Family           | Species                           | Gene name                 | Accession No.                   |                               |                |          |
|------------------------------|---------------------------------|------------------|-----------------------------------|---------------------------|---------------------------------|-------------------------------|----------------|----------|
| A-class<br>MADS-box<br>genes | Poales                          | Poaceae          | <i>Oryza sativa</i>               | <i>OsMADS14</i>           | AF058697                        |                               |                |          |
|                              |                                 |                  |                                   | <i>OsMADS15</i>           | AF058698                        |                               |                |          |
|                              | Ranunculales                    | Eupteleaceae     | <i>Euptelea pleiospermum</i>      | <i>EUplFL1</i>            | DQ656558                        |                               |                |          |
|                              |                                 |                  |                                   | <i>EUplFL2</i>            | DQ656559                        |                               |                |          |
|                              |                                 |                  |                                   | Lardizabalaceae           | <i>Akebia trifoliata</i>        | <i>AktFL1</i>                 | AY627632       |          |
|                              |                                 |                  |                                   |                           |                                 | <i>AktFL2</i>                 | GU357459       |          |
|                              |                                 |                  |                                   | <i>Decaisnea insignis</i> | <i>DEinFL1</i>                  | DQ656556                      |                |          |
|                              |                                 |                  |                                   |                           | <i>DEinFL2</i>                  | DQ656557                      |                |          |
|                              |                                 |                  |                                   |                           | <i>Sinofranchetia chinensis</i> | <i>SIchFL1</i>                | DQ656565       |          |
|                              |                                 |                  |                                   |                           |                                 | <i>SIchFL2</i>                | DQ656566       |          |
|                              |                                 |                  |                                   | Buxales                   | Buxaceae                        | <i>Pachysandra terminalis</i> | <i>PAteFL1</i> | DQ656553 |
|                              |                                 |                  |                                   |                           |                                 |                               | <i>PatFL2</i>  | AY306165 |
|                              | <i>PAteFL3</i>                  | DQ656562         |                                   |                           |                                 |                               |                |          |
|                              | Brassicales                     | Brassicaceae     | <i>Arabidopsis thaliana</i>       | <i>AP1</i>                | NM-105581                       |                               |                |          |
|                              |                                 |                  |                                   | <i>CAL</i>                | NM-102395                       |                               |                |          |
|                              |                                 |                  |                                   | <i>FUL</i>                | NM-125484                       |                               |                |          |
|                              |                                 |                  |                                   | <i>AGL79</i>              | NM-113925                       |                               |                |          |
|                              | Lamiales                        | Plantaginaceae   | <i>Antirrhinum majus</i>          | <i>SQUA</i>               | X63701                          |                               |                |          |
|                              | Solanales                       | Solanaceae       | <i>Petunia x hybrida</i>          | <i>FBP29</i>              | AF335245                        |                               |                |          |
|                              |                                 |                  |                                   | <i>PFG</i>                | AF176782                        |                               |                |          |
|                              |                                 |                  |                                   | <i>FBP26</i>              | AF176783                        |                               |                |          |
|                              | Asterales                       | Asteraceae       | <i>Chrysanthemum x morifolium</i> | <i>CDM111</i>             | AY173054                        |                               |                |          |
|                              |                                 |                  |                                   | <i>CDM41</i>              | AY173055                        |                               |                |          |
| <i>CDM8</i>                  |                                 |                  |                                   | AY173056                  |                                 |                               |                |          |
| B-class<br>MADS-box<br>genes | Poales                          | Poaceae          | <i>Oryza sativa</i>               | <i>SPW1</i>               | AF424549                        |                               |                |          |
|                              |                                 |                  |                                   | <i>OsMADS4</i>            | L37527                          |                               |                |          |
|                              | Ranunculales                    | Eupteleaceae     | <i>Euptelea pleiospermum</i>      | <i>EUplAP3-1</i>          | GU357449                        |                               |                |          |
|                              |                                 |                  |                                   | <i>EUplAP3-2</i>          | GU357450                        |                               |                |          |
|                              |                                 |                  |                                   | <i>EUplPI</i>             | GU357451                        |                               |                |          |
|                              |                                 |                  |                                   | Lardizabalaceae           | <i>Akebia trifoliata</i>        | <i>AktAP3-1</i>               | AY627630       |          |
|                              |                                 |                  |                                   |                           |                                 | <i>AktAP3-2</i>               | AY627631       |          |
|                              |                                 |                  |                                   |                           |                                 | <i>AktAP3-3</i>               | DQ303124       |          |
|                              |                                 |                  |                                   | <i>Decaisnea insignis</i> | <i>AktPI</i>                    | AY627634                      |                |          |
|                              |                                 |                  |                                   |                           | <i>DEinAP3-1</i>                | JQ806400                      |                |          |
|                              |                                 |                  |                                   |                           | <i>DEinAP3-2</i>                | JQ806401                      |                |          |
|                              |                                 |                  |                                   |                           | <i>DEinPI</i>                   | JQ806402                      |                |          |
|                              | <i>Holboellia grandiflora</i>   | <i>HOgrAP3</i>   | JQ806404                          |                           |                                 |                               |                |          |
|                              |                                 | <i>HOgrPI</i>    | JQ806405                          |                           |                                 |                               |                |          |
|                              | <i>Sinofranchetia chinensis</i> | <i>SIchAP3-1</i> | JQ806394                          |                           |                                 |                               |                |          |
|                              |                                 | <i>SIchAP3-2</i> | JQ806395                          |                           |                                 |                               |                |          |
|                              |                                 | <i>SIchAP3-3</i> | JQ806396                          |                           |                                 |                               |                |          |
|                              |                                 | <i>SIchPI</i>    | JQ806397                          |                           |                                 |                               |                |          |
|                              | Buxales                         | Buxaceae         | <i>Pachysandra terminalis</i>     | <i>PAteAP3-1</i>          | GU357454                        |                               |                |          |

|                              |                 |                               |                                   |                  |          |
|------------------------------|-----------------|-------------------------------|-----------------------------------|------------------|----------|
|                              |                 |                               |                                   | <i>PAteAP3-2</i> | GU357462 |
|                              |                 |                               |                                   | <i>PAtePI</i>    | GU357455 |
|                              | Brassicales     | Brassicaceae                  | <i>Arabidopsis thaliana</i>       | <i>AP3</i>       | M86357   |
|                              |                 |                               |                                   | <i>PI</i>        | D30807   |
|                              | Lamiales        | Plantaginaceae                | <i>Antirrhinum majus</i>          | <i>DEF</i>       | X62810   |
|                              | Solanales       | Solanaceae                    | <i>Petunia x hybrida</i>          | <i>phDEF</i>     | X69946   |
|                              |                 |                               |                                   | <i>phTM6</i>     | AF230704 |
|                              |                 |                               |                                   | <i>FBP1</i>      | AY532265 |
|                              |                 |                               |                                   | <i>pMADS2</i>    | X69947   |
|                              | Asterales       | Asteraceae                    | <i>Chrysanthemum x morifolium</i> | <i>CDM115</i>    | AY173060 |
|                              |                 |                               |                                   | <i>CDM19</i>     | AY173064 |
|                              |                 |                               |                                   | <i>CDM86</i>     | AY173061 |
| C-class<br>MADS-box<br>genes | Asparagales     | Agapanthaceae                 | <i>Agapanthus praecox</i>         | <i>ApMADS2</i>   | AB079260 |
|                              | Poales          | Poaceae                       | <i>Oryza sativa</i>               | <i>OsMADS3</i>   | L37528   |
|                              |                 |                               |                                   | <i>OsMADS13</i>  | AF151693 |
|                              | Ranunculales    | Eupteleaceae                  | <i>Euptelea pleiospermum</i>      | <i>EUplAG1</i>   | GU357452 |
|                              |                 |                               |                                   | <i>EUplAG2</i>   | GU357453 |
|                              |                 | Lardizabalaceae               | <i>Akebia trifoliata</i>          | <i>AktAG1</i>    | AY627635 |
|                              |                 |                               |                                   | <i>AktAG2</i>    | AY627629 |
|                              |                 |                               | <i>Decaisnea insignis</i>         | <i>DEinAG</i>    | JQ806403 |
|                              |                 |                               | <i>Holboellia grandiflora</i>     | <i>HOgrAG1</i>   | JQ806406 |
|                              |                 |                               |                                   | <i>HOgrAG2</i>   | JQ806407 |
|                              |                 |                               | <i>Sinofranchetia chinensis</i>   | <i>SIchAG</i>    | JQ806398 |
| Buxales                      | Buxaceae        | <i>Pachysandra terminalis</i> | <i>PAteAG</i>                     | GU357456         |          |
| Brassicales                  | Brassicaceae    | <i>Arabidopsis thaliana</i>   | <i>AG</i>                         | NM-118013        |          |
|                              |                 |                               | <i>SHP1</i>                       | NM-115740        |          |
|                              |                 |                               | <i>SHP2</i>                       | NM-129844        |          |
|                              |                 |                               | <i>STK</i>                        | NM-117064        |          |
|                              | Lamiales        | Plantaginaceae                | <i>Antirrhinum majus</i>          | <i>FAR</i>       | AJ239057 |
|                              |                 |                               |                                   | <i>PLE</i>       | S53900   |
|                              | Solanales       | Solanaceae                    | <i>Petunia x hybrida</i>          | <i>pMADS3</i>    | X72912   |
|                              |                 |                               |                                   | <i>FBP6</i>      | X68675   |
|                              |                 |                               |                                   | <i>FBP11</i>     | X81852   |
|                              |                 |                               |                                   | <i>FBP7</i>      | X81651   |
| E-class<br>MADS-box<br>genes | Asterales       | Asteraceae                    | <i>Chrysanthemum x morifolium</i> | <i>CDM37</i>     | AY173059 |
|                              | Asparagales     | Asparagaceae                  | <i>Asparagus officinalis</i>      | <i>AOM1</i>      | AY382400 |
|                              |                 |                               |                                   | <i>AOMADS2</i>   | DQ344503 |
|                              |                 |                               |                                   | <i>AOMADS3</i>   | DQ344504 |
|                              | Poales          | Poaceae                       | <i>Oryza sativa</i>               | <i>OsMADS7</i>   | U78891   |
|                              |                 |                               |                                   | <i>OsMADS8</i>   | U78892   |
|                              |                 |                               |                                   | <i>OsMADS1</i>   | L34271   |
|                              |                 |                               |                                   | <i>OsMADS5</i>   | U78890   |
|                              | Ranunculales    | Eupteleaceae                  | <i>Euptelea pleiospermum</i>      | <i>EUplSEP3</i>  | GU357460 |
|                              |                 |                               |                                   | <i>EUplSEP1</i>  | GU357461 |
|                              | Lardizabalaceae | <i>Akebia trifoliata</i>      | <i>AktSEP3</i>                    | AY627628         |          |
|                              |                 |                               | <i>AktSEP1-1</i>                  | GU357447         |          |
|                              |                 |                               | <i>AktSEP1-2</i>                  | GU357448         |          |

|             |                |              |                                   |                   |           |
|-------------|----------------|--------------|-----------------------------------|-------------------|-----------|
|             |                |              | <i>Sinofranchetia chinensis</i>   | <i>SIchSEP3</i>   | JQ806399  |
| Buxales     | Buxaceae       |              | <i>Pachysandra terminalis</i>     | <i>PAteSEP3-1</i> | GU357457  |
|             |                |              |                                   | <i>PAteSEP3-2</i> | GU357458  |
| Brassicales | Brassicaceae   |              | <i>Arabidopsis thaliana</i>       | <i>SEP3</i>       | NM-102272 |
|             |                |              |                                   | <i>SEP1</i>       | NM-121585 |
|             |                |              |                                   | <i>SEP2</i>       | NM-111098 |
|             |                |              |                                   | <i>SEP4</i>       | NM-126418 |
| Lamiales    | Plantaginaceae |              | <i>Antirrhinum majus</i>          | <i>DEFH200</i>    | X95469    |
|             |                |              |                                   | <i>DEFH72</i>     | X95468    |
|             |                |              |                                   | <i>DEFH49</i>     | X95467    |
| Solanales   | Solanaceae     |              | <i>Petunia x hybrida</i>          | <i>FBP2</i>       | M91666    |
|             |                |              |                                   | <i>pMADS12</i>    | AY370527  |
|             |                |              |                                   | <i>FBP9</i>       | AF335236  |
|             |                |              |                                   | <i>FBP5</i>       | AF335235  |
|             |                |              |                                   | <i>FBP4</i>       | AF335234  |
|             |                |              |                                   | <i>FBP23</i>      | AF335241  |
| Asterales   | Asteraceae     |              | <i>Chrysanthemum x morifolium</i> | <i>CDM44</i>      | AY173057  |
| Outgroup    | Brassicales    | Brassicaceae | <i>Arabidopsis thaliana</i>       | <i>SVP</i>        | NM-127820 |

TABLE S4. Genes used in the phylogenetic analysis of AP3-like genes in Ranunculales

| Order        | Family        | Species                         | Gene name        | Accession No.               |
|--------------|---------------|---------------------------------|------------------|-----------------------------|
| Ranunculales | Ranunculaceae | <i>Aconitum sinomontanum</i>    | <i>AcsAP3-1</i>  | EU481818                    |
|              |               |                                 | <i>AcsAP3-2</i>  | EU481817                    |
|              |               |                                 | <i>AcsAP3-3</i>  | EU481816                    |
|              |               | <i>Actaea asiatica</i>          | <i>AcaAP3-1</i>  | HQ647375                    |
|              |               |                                 | <i>AcaAP3-2</i>  | HQ647376                    |
|              |               | <i>Adonis vernalis</i>          | <i>AdvAP3-2</i>  | HQ694800                    |
|              |               |                                 | <i>AdvAP3-3</i>  | HQ694799                    |
|              |               | <i>Anemone nemorosa</i>         | <i>AnnAP3-1</i>  | AY162841                    |
|              |               |                                 | <i>AnnAP3-2</i>  | AY162842                    |
|              |               |                                 | <i>AnnAP3-3</i>  | AY162843                    |
|              |               | <i>Aquilegia alpina</i>         | <i>AqaAP3-1</i>  | AY162849                    |
|              |               |                                 | <i>AqaAP3-2</i>  | AY162850                    |
|              |               |                                 | <i>AqaAP3-3</i>  | AY162851                    |
|              |               | <i>Caltha palustris</i>         | <i>CapAP3-1</i>  | EU481813                    |
|              |               |                                 | <i>CapAP3-2</i>  | EU481812                    |
|              |               | <i>Cimicifuga racemosa</i>      | <i>CirAP3-1</i>  | AY162862                    |
|              |               |                                 | <i>CirAP3-2</i>  | AY162863                    |
|              |               |                                 | <i>CirAP3-3</i>  | AY162864                    |
|              |               | <i>Clematis alpina</i>          | <i>ClaAP3-1</i>  | EU481808                    |
|              |               |                                 | <i>ClaAP3-2</i>  | EU481807                    |
|              |               |                                 | <i>ClaAP3-3</i>  | EU481806                    |
|              |               | <i>Clematis integrifolia</i>    | <i>CliAP3-1</i>  | AY162870                    |
|              |               |                                 | <i>CliAP3-2</i>  | AY162871                    |
|              |               | <i>Delphinium exaltatum</i>     | <i>DleAP3-1</i>  | EU481804                    |
|              |               |                                 | <i>DleAP3-2</i>  | EU481803                    |
|              |               |                                 | <i>DleAP3-3</i>  | EU481802                    |
|              |               | <i>Helleborus hydrida</i>       | <i>HhAP3-1</i>   | Sharma <i>et al.</i> , 2011 |
|              |               |                                 | <i>HhAP3-2</i>   | Sharma <i>et al.</i> , 2011 |
|              |               |                                 | <i>HhAP3-3a</i>  | Sharma <i>et al.</i> , 2011 |
|              |               |                                 | <i>HhAP3-3b</i>  | Sharma <i>et al.</i> , 2011 |
|              |               | <i>Hepatica henryi</i>          | <i>HeheAP3-1</i> | HQ647378                    |
|              |               |                                 | <i>HeheAP3-2</i> | HQ647379                    |
|              |               | <i>Hydrastis canadensis</i>     | <i>HycAP3-1</i>  | EU481800                    |
|              |               | <i>Nigella sativa</i>           | <i>NgsAP3-2</i>  | HQ694795                    |
|              |               |                                 | <i>NgsAP3-3</i>  | HQ694794                    |
|              |               | <i>Ranunculus bulbosus</i>      | <i>RbAP3-1</i>   | AF052876                    |
|              |               |                                 | <i>RbAP3-2</i>   | AF130869                    |
|              |               | <i>Ranunculus ficaria</i>       | <i>RfAP3-1</i>   | AF052854                    |
|              |               |                                 | <i>RfAP3-2</i>   | AF130870                    |
|              |               |                                 | <i>RfAP3-3</i>   | AY162883                    |
|              |               | <i>Thalictrum dioicum</i>       | <i>ThdAP3-1</i>  | AY867875                    |
|              |               |                                 | <i>ThdAP3-2a</i> | AY867876                    |
|              |               |                                 | <i>ThdAP3-2b</i> | AY867877                    |
|              |               | <i>Thalictrum thalictroides</i> | <i>ThtAP3-1</i>  | AY162886                    |

|                  |                  |                                    |                  |          |
|------------------|------------------|------------------------------------|------------------|----------|
|                  |                  |                                    | <i>ThtAP3-2a</i> | AY162887 |
|                  |                  |                                    | <i>ThtAP3-2b</i> | AY162888 |
|                  |                  | <i>Trautvetteria caroliniensis</i> | <i>TrcAP3</i>    | AY162904 |
|                  |                  | <i>Trollius laxus</i>              | <i>TllAP3-1</i>  | AY162890 |
|                  |                  |                                    | <i>TllAP3-2</i>  | AY162892 |
|                  |                  |                                    | <i>TllAP3-3</i>  | AY162894 |
|                  |                  | <i>Xanthorhiza simplicissima</i>   | <i>XsAP3-2</i>   | EU481797 |
|                  |                  |                                    | <i>XsAP3-3</i>   | EU481796 |
| Berberidaceae    |                  | <i>Berberis gilgiana</i>           | <i>BgAP3-1</i>   | AY162857 |
|                  |                  |                                    | <i>BgAP3-2</i>   | AY162858 |
|                  |                  | <i>Epimedium grandiflorum</i>      | <i>EpgAP3-1</i>  | EU481793 |
|                  |                  |                                    | <i>EpgAP3-3</i>  | EU481794 |
|                  |                  | <i>Jeffersonia diphylla</i>        | <i>JdAP3-1</i>   | EU481791 |
| Circaeasteraceae |                  | <i>Kingdonia uniflora</i>          | <i>KiuAP3a</i>   | HQ647371 |
|                  |                  |                                    | <i>KiuAP3b</i>   | HQ647372 |
| Menispermaceae   |                  | <i>Cocculus trilobus</i>           | <i>CctAP3-1</i>  | HQ694788 |
|                  |                  |                                    | <i>CctAP3-2</i>  | HQ694789 |
|                  |                  |                                    | <i>CctAP3-3</i>  | HQ694790 |
|                  |                  | <i>Menispermum dauricum</i>        | <i>MndAP3-1</i>  | EU481786 |
|                  |                  |                                    | <i>MndAP3-2</i>  | EU481784 |
|                  |                  |                                    | <i>MndAP3-3</i>  | EU481783 |
| Lardizabalaceae  |                  | <i>Akebia quinata</i>              | <i>AkqAP3-1</i>  | AY162835 |
|                  |                  |                                    | <i>AkqAP3-2</i>  | AY162839 |
|                  |                  | <i>Decaisnea insignis</i>          | <i>DEinAP3-1</i> | JQ806400 |
|                  |                  |                                    | <i>DEinAP3-2</i> | JQ806401 |
|                  |                  | <i>Holboellia coriacea</i>         | <i>HbcAP3-1</i>  | EU481789 |
|                  |                  |                                    | <i>HbcAP3-2</i>  | EU481788 |
|                  |                  | <i>Holboellia grandiflora</i>      | <i>HOgrAP3</i>   | JQ806404 |
|                  |                  | <i>Sinofranchetia chinensis</i>    | <i>SIchAP3-1</i> | JQ806394 |
|                  |                  |                                    | <i>SIchAP3-2</i> | JQ806395 |
|                  |                  |                                    | <i>SIchAP3-3</i> | JQ806396 |
| Papaveraceae     |                  | <i>Eschscholzia californica</i>    | <i>EcDEF1</i>    | EF378697 |
|                  |                  |                                    | <i>EcDEF2</i>    | EF378698 |
|                  |                  | <i>Papaver nudicaule</i>           | <i>PnAP3-1</i>   | AF052873 |
|                  |                  |                                    | <i>PnAP3-2</i>   | AF052874 |
|                  |                  | <i>Sanguinaria canadensis</i>      | <i>ScAP3</i>     | AF130868 |
| Fumariaceae      |                  | <i>Dicentra eximia</i>             | <i>DeAP3</i>     | AF052875 |
| Eupteleaceae     |                  | <i>Euptelea pleiosperma</i>        | <i>EupAP3-1</i>  | GU357449 |
| Buxales          | Buxaceae         | <i>Pachysandra procumbens</i>      | <i>PpAP3-1</i>   | DQ479360 |
|                  |                  |                                    | <i>PpAP3-2</i>   | DQ479361 |
|                  |                  |                                    | <i>PpAP3-3</i>   | DQ479362 |
| Proteales        | Nelumbonaceae    | <i>Nelumbo nucifera</i>            | <i>NnAP3</i>     | DQ453775 |
| Sabiaceae        | Sabiaceae        | <i>Meliosma dilleniifolia</i>      | <i>MdAP3-1</i>   | AY436709 |
|                  |                  |                                    | <i>MdAP3-2</i>   | AY436710 |
|                  |                  |                                    | <i>MdAP3-3</i>   | AY436711 |
|                  | Platanaceae      | <i>Platanus occidentalis</i>       | <i>PloAP3-1</i>  | AAO26529 |
| Trochodendrales  | Trochodendraceae | <i>Trochodendron aralioides</i>    | <i>TraAP3</i>    | DQ453774 |

TABLE S5. Genes used in the phylogenetic analysis of *PI*-like genes in Ranunculales

| Order          | Family                      | Species                            | Gene name                     | Accession No.               |          |
|----------------|-----------------------------|------------------------------------|-------------------------------|-----------------------------|----------|
| Ranunculales   | Ranunculaceae               | <i>Aconitum sinomontanum</i>       | <i>AcsPI</i>                  | EU481819                    |          |
|                |                             | <i>Actaea asiatica</i>             | <i>AcaPI</i>                  | HQ647377                    |          |
|                |                             | <i>Adonis vernalis</i>             | <i>AdvPI-1</i>                | HQ694801                    |          |
|                |                             |                                    | <i>AdvPI-2</i>                | HQ694802                    |          |
|                |                             | <i>Anemone nemorosa</i>            | <i>AnnPI-1</i>                | AY162845                    |          |
|                |                             |                                    | <i>AnnPI-2</i>                | AY162847                    |          |
|                |                             | <i>Aquilegia alpina</i>            | <i>AqaPI</i>                  | AY162852                    |          |
|                |                             | <i>Cimicifuga racemosa</i>         | <i>CirPI-1</i>                | AY162865                    |          |
|                |                             |                                    | <i>CirPI-2</i>                | AY162867                    |          |
|                |                             | <i>Clematis integrifolia</i>       | <i>CliPI-1</i>                | AY162872                    |          |
|                |                             |                                    | <i>CliPI-2</i>                | AY162873                    |          |
|                |                             | <i>Caltha palustris</i>            | <i>CapPI</i>                  | EU481814                    |          |
|                |                             | <i>Clematis alpina</i>             | <i>ClaPI-1</i>                | EU481811                    |          |
|                |                             |                                    | <i>ClaPI-2</i>                | EU481810                    |          |
|                |                             | <i>Delphinium exaltatum</i>        | <i>DlePI</i>                  | EU481805                    |          |
|                |                             | <i>Helleborus hydrida</i>          | <i>HhPI1</i>                  | Sharma <i>et al.</i> , 2011 |          |
|                |                             |                                    | <i>HhPI2</i>                  | Sharma <i>et al.</i> , 2011 |          |
|                |                             |                                    | <i>HhPI3</i>                  | Sharma <i>et al.</i> , 2011 |          |
|                |                             | <i>Hepatica henryi</i>             | <i>HehePI</i>                 | HQ647380                    |          |
|                |                             | <i>Hydrastis canadensis</i>        | <i>HycPI</i>                  | EU481801                    |          |
|                |                             | <i>Nigella sativa</i>              | <i>NgsPI-1</i>                | HQ694797                    |          |
|                |                             |                                    | <i>NgsPI-2</i>                | HQ694796                    |          |
|                |                             | <i>Ranunculus bulbosus</i>         | <i>RbPI-1</i>                 | AF052859                    |          |
|                |                             |                                    | <i>RbPI-2</i>                 | AF052860                    |          |
|                |                             | <i>Ranunculus ficaria</i>          | <i>RfPI-1</i>                 | AF052858                    |          |
|                |                             |                                    | <i>RfPI-1b</i>                | AY162884                    |          |
|                |                             |                                    | <i>RfPI-2</i>                 | AF130872                    |          |
|                |                             |                                    | <i>RfPI-3</i>                 | AY162885                    |          |
|                |                             | <i>Thalictrum thalictroides</i>    | <i>ThtPI-1</i>                | AY162889                    |          |
|                |                             | <i>Trautvetteria caroliniensis</i> | <i>TrcPI-1</i>                | AY162905                    |          |
|                |                             |                                    | <i>TrcPI-2</i>                | AY162906                    |          |
|                |                             | <i>Trollius laxus</i>              | <i>TllPI-1</i>                | AY162896                    |          |
|                |                             |                                    | <i>TllPI-2</i>                | AY162898                    |          |
|                |                             |                                    | <i>TllPI-3</i>                | AY162900                    |          |
|                |                             |                                    | <i>TllPI-4</i>                | AY162902                    |          |
|                |                             | <i>Xanthorhiza simplicissima</i>   | <i>XsPI-1</i>                 | EU481799                    |          |
|                |                             |                                    | <i>XsPI-2</i>                 | EU481798                    |          |
|                |                             | Berberidaceae                      | <i>Berberis gilgiana</i>      | <i>BgPI-1</i>               | AY162860 |
|                |                             |                                    |                               | <i>BgPI-2</i>               | AY162861 |
|                |                             |                                    | <i>Epimedium grandiflorum</i> | <i>EpgPI</i>                | EU481795 |
|                |                             |                                    | <i>Jeffersonia diphylla</i>   | <i>JdPI</i>                 | EU481792 |
|                |                             |                                    | <i>Nandina domestica</i>      | <i>NndPI</i>                | HQ694793 |
| Podophyllaceae | <i>Podophyllum peltatum</i> | <i>PdcPI</i>                       | HQ694792                      |                             |          |
|                | Circaeasteraceae            | <i>Circaeaster agrestis</i>        | <i>CiaPI</i>                  | HQ647374                    |          |



|                 |                                 |               |          |
|-----------------|---------------------------------|---------------|----------|
|                 | <i>Kingdonia uniflora</i>       | <i>KiuPI</i>  | HQ647373 |
| Menispermaceae  | <i>Menispermum dauricum</i>     | <i>MndPI</i>  | EU481787 |
|                 | <i>Cocculus trilobus</i>        | <i>CctPI</i>  | HQ694791 |
| Lardizabalaceae | <i>Akebia trifoliata</i>        | <i>AktPI</i>  | AY627634 |
|                 | <i>Akebia quinata</i>           | <i>AkqPI</i>  | AY162837 |
|                 | <i>Decaisnea insignis</i>       | <i>DEinPI</i> | JQ806402 |
|                 | <i>Holboellia coriacea</i>      | <i>HbcPI</i>  | EU481790 |
|                 | <i>Holboellia grandiflora</i>   | <i>HOgrPI</i> | JQ806405 |
|                 | <i>Sinofranchetia chinensis</i> | <i>SIchPI</i> | JQ806397 |
| Papaveraceae    | <i>Eschscholzia californica</i> | <i>EcGLO</i>  | EF378699 |
|                 | <i>Papaver nudicaule</i>        | <i>PnPI-1</i> | AF052855 |
|                 |                                 | <i>PnPI-1</i> | AF052856 |
|                 | <i>Sanguinaria canadensis</i>   | <i>ScPI</i>   | AF130871 |
| Fumariaceae     | <i>Dicentra eximia</i>          | <i>DePI</i>   | AF052857 |
| Eupteleaceae    | <i>Euptelea pleiosperma</i>     | <i>EupPI</i>  | GU357451 |

---

FIG. S1. Multiple sequence alignment for AP3-like proteins of representative species from Ranunculales. The conserved MADS domain and K domain are highlighted by a solid line and a dashed line, respectively. The PI-motif-derived and paleoAP3 motifs are indicated with boxes.

```

RfAP3-1 -----NRQVTYSKRRAGIMKKAKELTVLCDAKVS LIMFSSTGKCVDFISPSIS--PKAFYDKYRDVTGDDLWKSQY
CirAP3-1 -----GGIMKKAKELHVLCDAEVSLIMFSNTGKMTDFISPNIT--MKMYDKYQQASGLNLWQSQY
EpgAP3-3 -----TGIVKKARELTVLCDAEVSLIMFSSTGKLSEYISPSIT--TKKLFQYQQMTAINLWNSHY
MndAP3-1 -----SGIMKKARELTVLCDAEVSLIMFSSTGKFSEYVGPVSVT--TKKMFQYQQVTGINLWNSHY
SIchAP3-1 -----NRQVTYSKRRAGITKKARELSVLCDAEVSLIMFSNTGKLSEYITPSVT--PKKVFDRYQQTLGINLWNSHY
PnAP3-2 MGRGKIEIKRIENATNRQVTYSKRRSGILKKAKELTVLCDAEVSLIMFSSTGKMTSEYLSPSLNGNTKRVDYKQQLSGISLWNSHY
RfAP3-2 -----AGIMKKAQELTVLCDAKVALIMFSSTGKVSSEYVSPGTS--FKSYVDYQQAINKMSLWDSHY
CirAP3-2 -----AGITKKAQELTVLCDAQVSLIMISSTGKLFSEYTSSTT--TKSIYDRYQQTTGLNLWQSHY
BgAP3-2 -----TGIMKKAKELTVLCDAEVSLIMFSSTRKLFSEFISPSST--VKKIFDRYQQVTGKQLWQHSHY
MndAP3-2 -----AGIMKKARELTVLCDAEVSLIMFSSTGKVFSEYISPSST--TKKIFDRYQQVSGISLWQSHY
SIchAP3-2 -----NRQVTYSKRRAGIVKKAQELTVLCDAEVSLIMFSSTGKVFSEYISPSVT--TKKVFDRYQHVSGINIWHSY
RfAP3-3 -----TGIVKKARELTVLCDAQVSLIMFSSTGKLSEYISPSIT--RKKVYDMYQKVAEVDLWNSHY
CirAP3-3 -----TGIVKKARELTVLCDAEVSLIMFSSTGKLSEYISPSIT--TKKIYDQYQQVTGVDLWNSHY
BgAP3-1 -----TGIVKKARELTVLCDAEVSLIMFSSTGKLSEYISPSIT--TKRFLDQYQQMTGINLWTHSHY
EpgAP3-1 -----AGIFKKAKELAVLCDAEVSLMFSNTGKLSEFKSPSLT--LKNVYDRYQQNTGIDLWQSHY
MndAP3-3 -----TGIVKKARELTVLCDAEVSLIMFSSTGKLSEFISPSIT--MKKLFQYQQVSGIDLWNSHY
SIchAP3-3 -----NRQVTYSKRRAGIVKKAQELTVLCDAEVSLIMFSSTGKVFSEYISPSIT--TKRFLDQYQQVSGIDLWNSHY
PnAP3-1 -----SGIFKKAKELTILCDAQVCLIMFSNTGKVFSEYVSPSTT--MKEFFDRFRRTINIDLWASQY

```

**MADS domain**

```

RfAP3-1 DKMQQELKTLVETNRKLREIGQVRG-EDLSNLSIKELRGLEQLDRDTEKVVQRKFGLLSSQGETQRKKIRNLAEINGNLWQY-
CirAP3-1 EKMQDNLNKLMEINRKLREIGKRLG-EDLNDLSFAELRGLEQLHLESSCKTVRDRKFGLLGTQTETCRKKIKNLEEVHNNLLHEY-
EpgAP3-3 ERMQESLRKQNETNMKLREIGQRKG-EGLDLDFDDLGNLEQLNSSLKTVRDRKYHMIATQTETYRKKLRNLQETHSLIREF-
MndAP3-1 ERMQDHLNKLEIINRKLREIRHRIG-EDSNLDSIEELRGLEQLNSSLKIVRERKYHLISSKTKLENVEETYNNLMQEL-
SIchAP3-1 ERMQENLNKQKEINRRLREIRQRMG-EDLNELSDVLRGLEQLNSSLKIVRERKYHLITTTQTDYRKKLRNLLEETHNNLIREL-
PnAP3-2 ESLQNALNKQKEINRRLREIRQRMG-EDLDELTEELRSLEQLNEASVKVVRDRKYHVIITQTETTRKKLRNHTEQNHGLLREF-
RfAP3-2 EKMQGTLLKVKETNNNLRREIRQRQG-DDLDGLSFMELRGLEQLNSSLVDRVRHRKKNHVIRTQDNTNKKIKSHEETNRNFMASL-
EKMQENLNKLKETNSKLREIRQRNG-EDIDDLTFQQLRGLEQLNSSLKIVRERKYHVIITQTDYRKKLRNLLEETHNNLRAF-
BgAP3-2 EKMQETLNKLDVNNNLRREIRQRKGDDDLDDLNIEQLRDLEQNMEKSVKAVRDRKHFVIGTQNTSKKKIKNLQETHKFLCEL-
MndAP3-2 ERMQDNLNKLKEINNLRREIRHRIG-EDLNDLSIEELRSLEQLNSSLKSVRERKYHVIHNTQETCKKKLRNLEERHNDLLEL-
SIchAP3-2 ERMQDHLKQKEINNLRREIRQRIGGDDLNGLSIQELRGLEQLNSSLKTVRERK-----
RfAP3-3 ERMQKELKLLKETNMELRKEIRQRVG-EEIDLSIQQLRGLEQLDDESVKAVRDRKYHTIATQTETYRKKLRNLHETHHLVREI-
CirAP3-3 EKMQETLKKQKESNMKLREIRQRNG-EGLDLDFDELRGLEQLNSSLKIVRERKYHVIITQTDYRKKLRNLQETHHLVREF-
BgAP3-1 ERMQESLKKQNDTNMRLREISQRMG-ECLDELNFDLHSLQDLGSLKVVDRDRKYHMIATQTETYRKKLRNLLEETHKNLVREF-
EpgAP3-1 ERMQENLNKQKELNNKLREIGQRTG-EDISGLTLADLRGLEQLDLSLRTVDRERKYHVIITQTDYRKKLRNVVETHNNLNLQ-
MndAP3-3 ERMQENLNSLKEINLKLREISQRMG-QYMDLDSIEELRRLHEDLESSLKTVRDRKYHTIATQTETYRKKLRNLQETHSLLEF-
SIchAP3-3 ERMQELNKQLEINMRLREIKRIG-EGLNDLSFEELRGLEQLNSSLKIVRERKYHMIITQTDYRKKLRNLQETHNNLHFEF-
PnAP3-1 ETLQEEELKQKEINNKLKKEIRQRTGQDDLSELSLDEMIRILEKNLIDSADIVRNRKNHVLNSHTETSKKRKAQEETYNLVRALH

```

**K domain**

```

RfAP3-1 ---QERMED---EYAL-AN--G-----M-S-----TLELNG-----VFSFRLRPS-QTNLHN--DEEYETHDLRLA-
CirAP3-1 ---EERLEE---AYAL-ANHEG-----M-S-----TNELANDG---SHVFMFRLQPS-QPNLRD--DGGYGIHDLRLG-
EpgAP3-3 ---EARGED-PYY-----DGE---LET-----IMGMVSG-----LYSFHLYPS-QPNLQD--GGEYES--FNL-
MndAP3-1 ---EGRIGS---QFSM-TNAEED---YHS-----AVHQVNGG---SQI---FRLQPS-QPNLQD--GGYGSYGLRLM-
SIchAP3-1 -VQEGRNED-LHYAFGNNHEGD---YQS-----ALELANGG---SHIFALRLQPS-QPNLRD--GGYGSYGLRLA-
PnAP3-2 ---EPILDEDPHYVI-AHQEED---YES-----AIELAHGG---PNIFAFRLQPS-QPNLHN--GGGYNCHDLRLA-
RfAP3-2 ---EQMGKVEPQYAY-VPQDED-----YDANNMG---SRIYAIHQTH-Q-N---GEDYGSYGLSLA-
CirAP3-2 ---EERIEEDCHYAL-VDQEGD---YQS-----AIGLANGG---PHIFSIQLQPS-QPNLRD--DEGYASYGLRLA-
BgAP3-2 ---DQ-----IEL-ASH-----FES-----SSFGLANRS---SHEFAFRLQPS-TPNLQD--GRGYGSYDFHLA-
MndAP3-2 ---EGRDAD-SHYSL-A-----ES-----SLGLANGN---SHVFAFRLHPF-HPNL-----GGYGSYDFHLA-
SIchAP3-2 ---EGREDE-PQFAL-ADHEGE---YES-----ALGSTNGG---SHMFAFRLQPS-QPNLQD--GSGFGTYDLRLA-
RfAP3-3 ---EARGED-AYY-----DGD---YEA-----IMALTNAG---AHFLPYGLHPG-QPDHHD--GDGYALHNLRLA-
CirAP3-3 ---EARGED-PYY-----EGG---YES-----LLGMSNGA---AHLPLPYRLQPS-QPNLQD--GENYGSYNLRLG-
BgAP3-1 ---EIRGED-PYY-----EAD---MET-----SMDVVNG-----LYDYRLQLN-QPNL-R--GEGFQY-FGVMH-
EpgAP3-1 ---EVNQMA-----KESD---YHL-----AIELANAG---SPVVAFRLQPN-QPNLHD--EGYGLRDLRLS-
MndAP3-3 ---EARGED-PYYN-----EGE---YET-----LVGLNGS---ADIVSFHFQPN-LPS---GGGFGPYNLRLA-
SIchAP3-3 ---EDKDED-PYYGL-AD-NGR---YYES-----SLGLVNEP---PQIFSFHLQQAQPNLQD--GGYGFGLTHLS-
PnAP3-1 SQADREEQEFHFYAI PADTEGDHHRDYLSSSSSMRRLSISGGGCENSQITFQLQPS-QPNLHHAAGGY-FYSQHYA-

```

**PI Motif-Derived PaleoAP3 Motif**

FIG. S2. Maximum-likelihood tree of *PI*-like genes in Ranunculales. Bootstrap values (>50%) are shown above the branches. The inferred small-scale gene duplication events are indicated with dots.

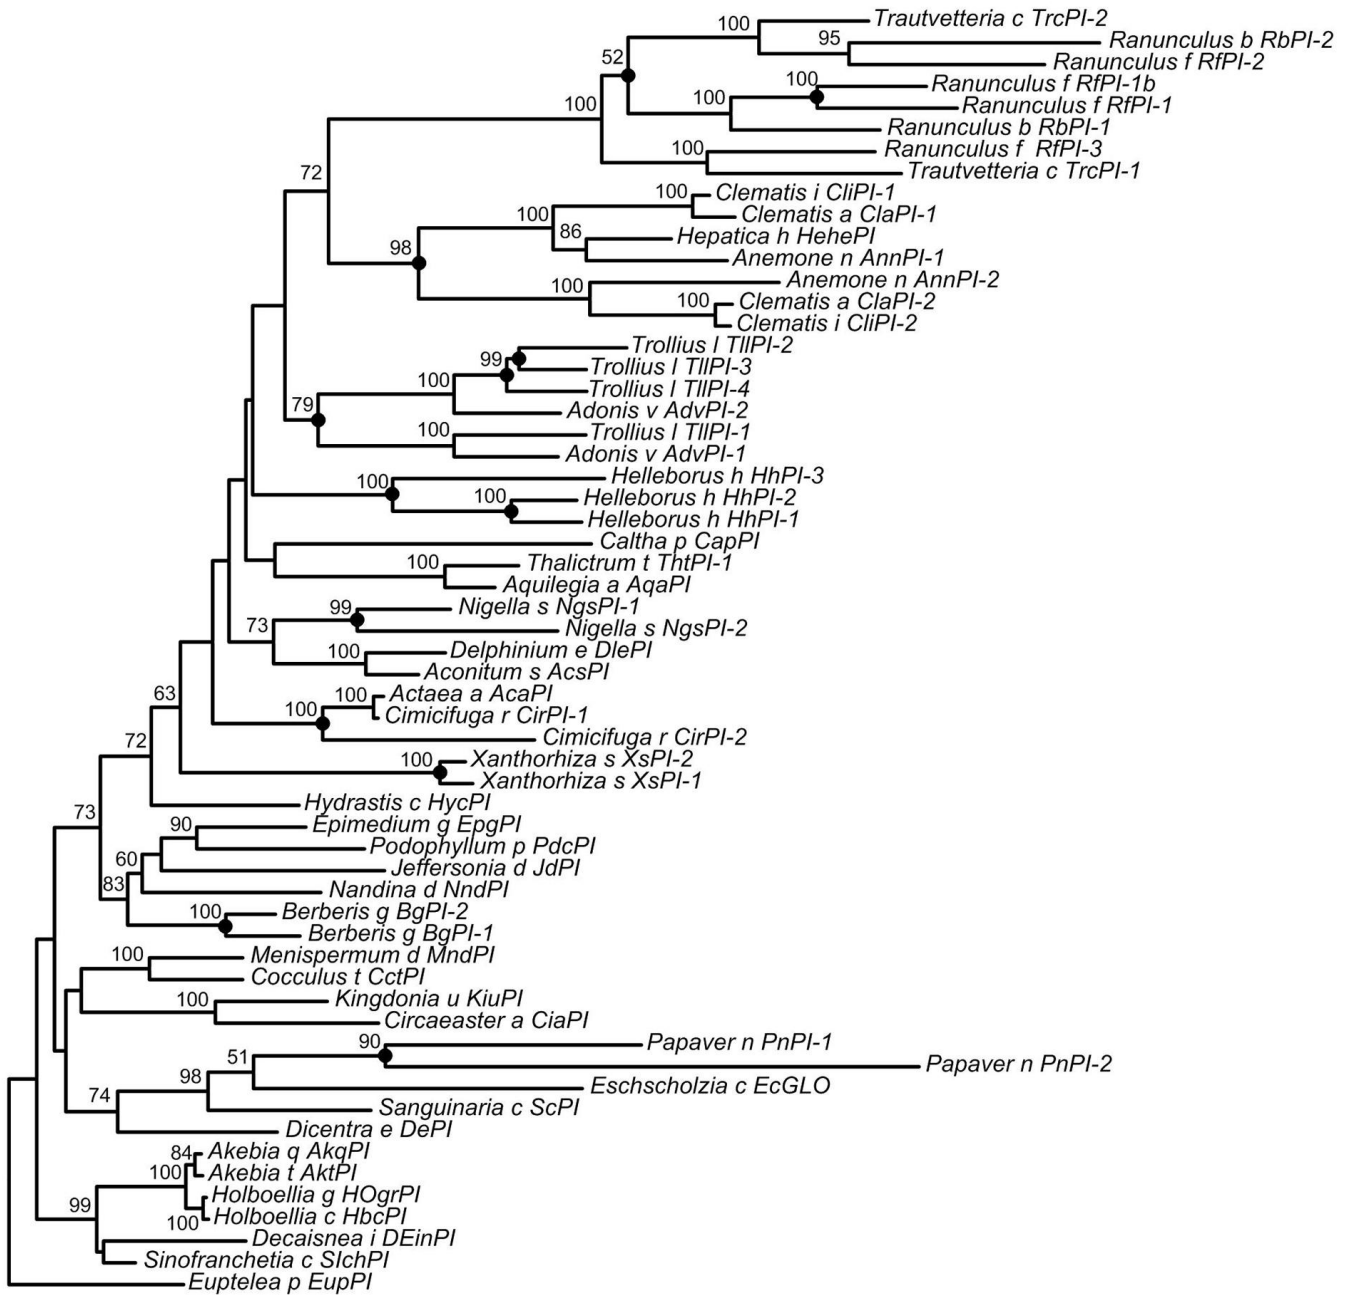

0.05
